# Supplementary material for: Biomphalaria glabrata transcriptome: cDNA microarray profiling identifies resistant- and susceptible-specific gene expression in haemocytes from snail strains exposed to Schistosoma mansoni
Source: PubMed Central journal article supplement (PMC2631019; doi:10.1186/1471-2164-9-634), 2008-12-29

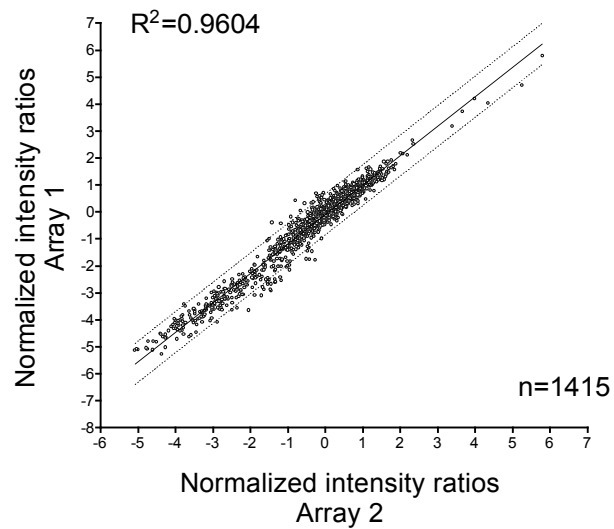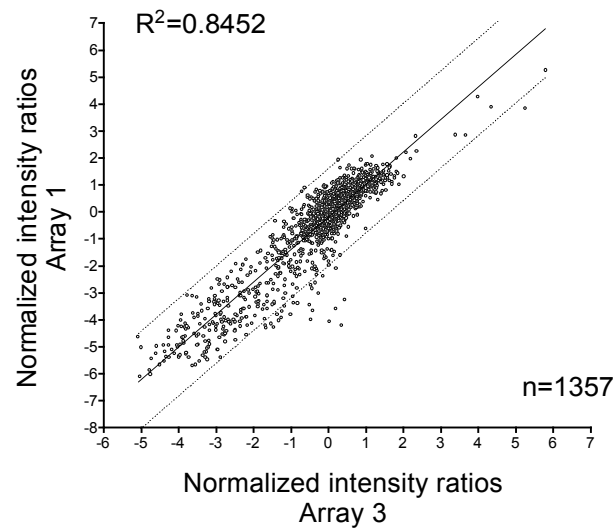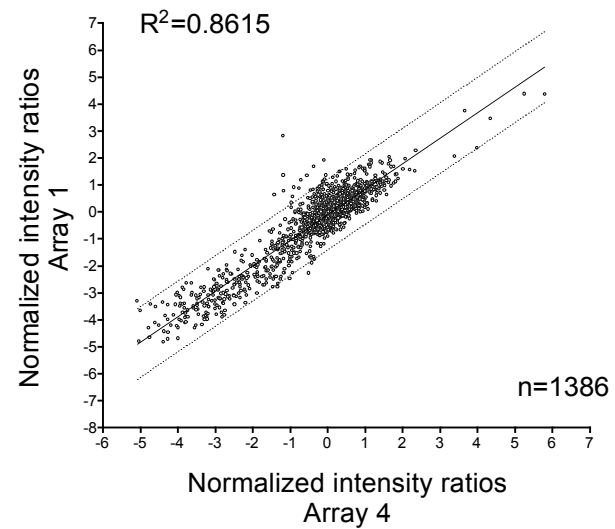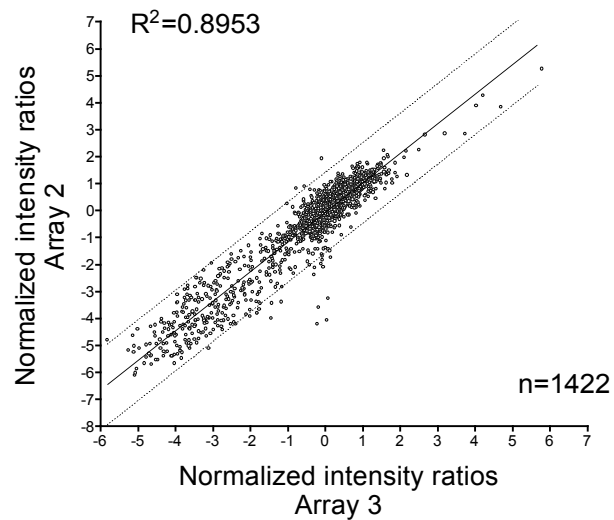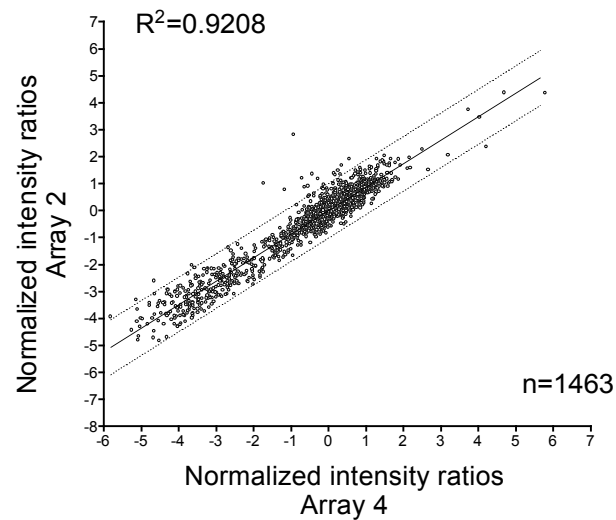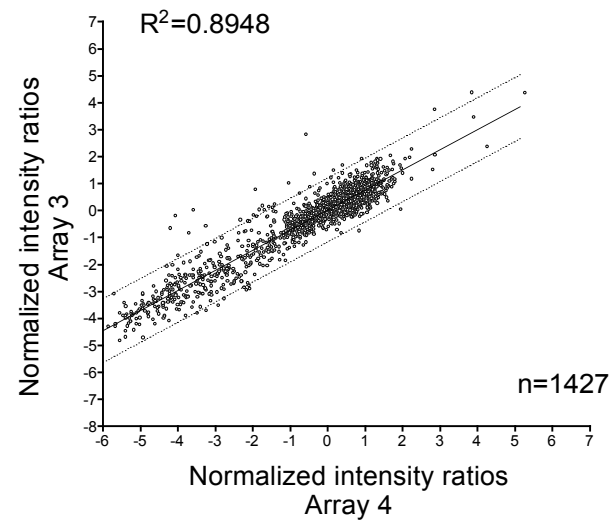

Supplement: 1471-2164-9-634-S2.pdf [file 1471-2164-9-634-S2.pdf]
